# Supplementary material for: Feasibility of Delivering an on-Campus Food Distribution Program in a Community College Setting: A Mixed Methods Sequential Explanatory Investigation
Source: MDPI journal article supplement (doi:10.3390/ijerph182212106), 2021-11-18
Supplement: s1 [file s1]

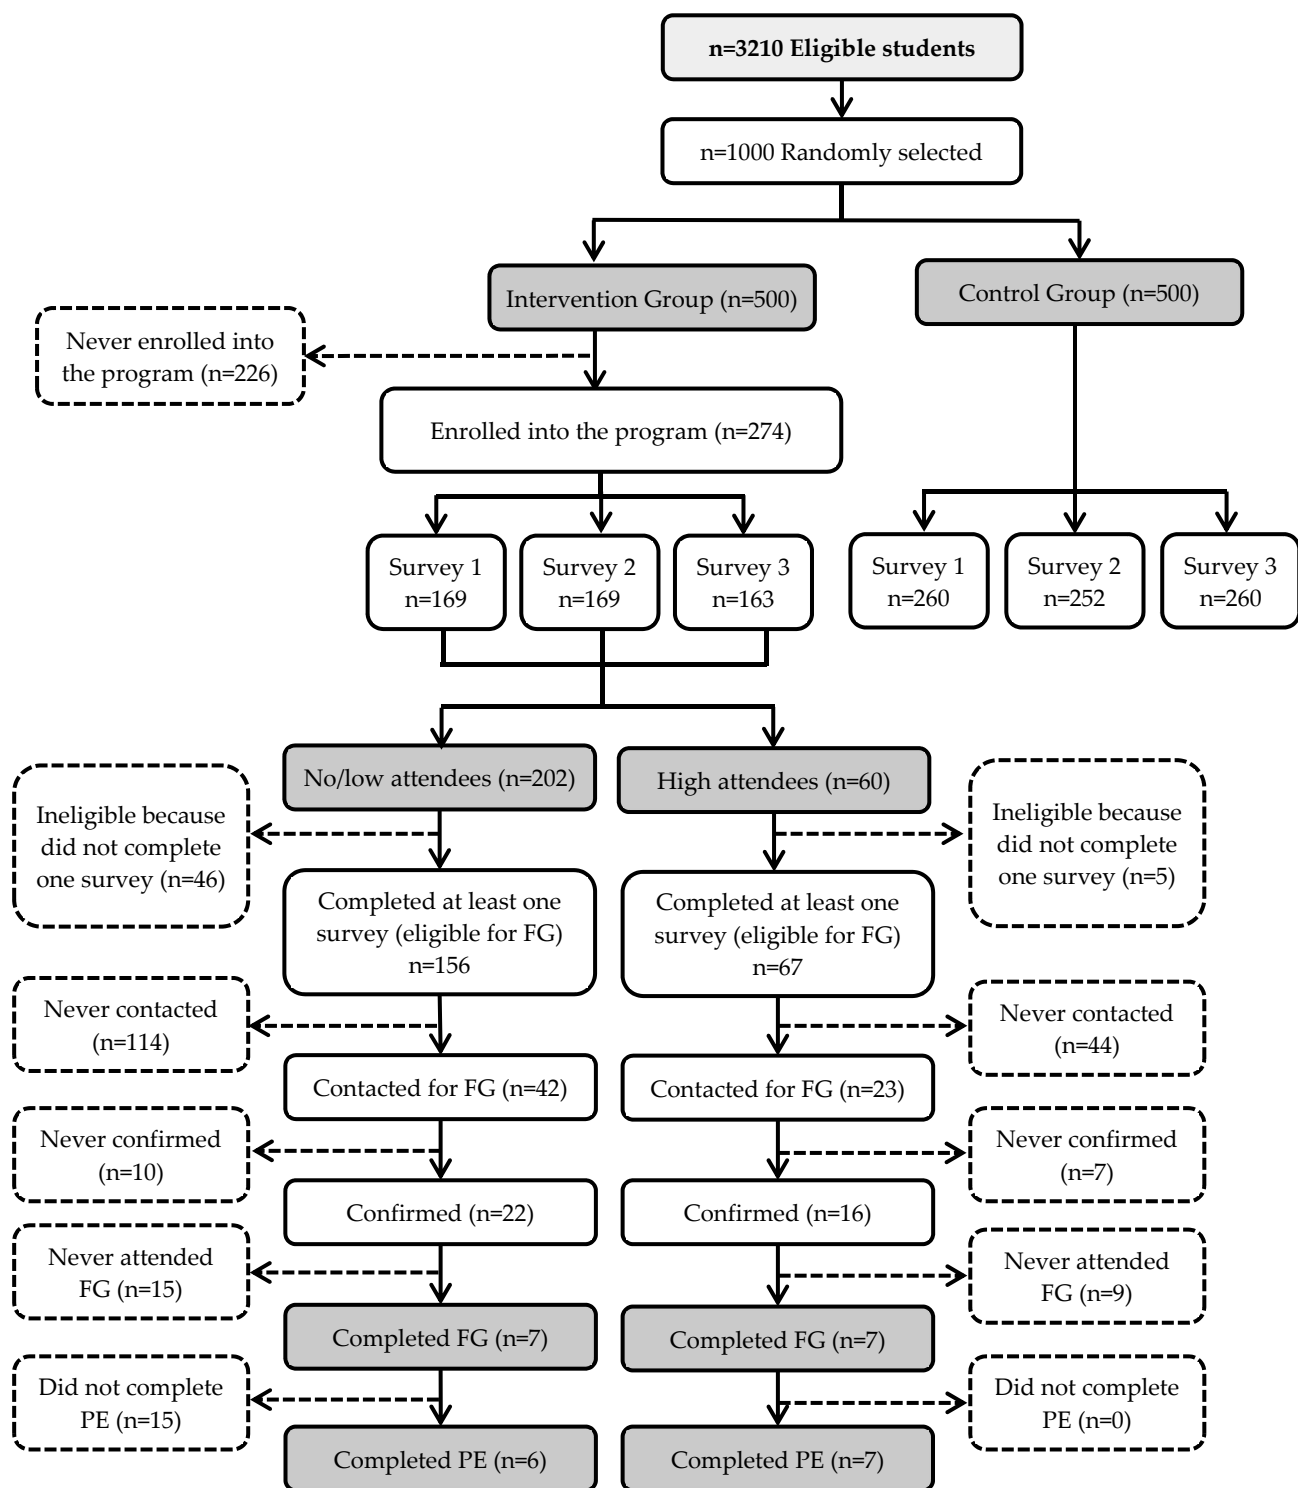

**Supplementary Figure S1.** Consort diagram of cohort 1

No/low attendees= attended 0-2 food distributions; High attendees= attended  $\geq 3$  food distributions; FG= Focus group; PE=Photo elicitation

Note. Those who did not complete at least one survey were ineligible for focus groups

----- Excluded from the sample.

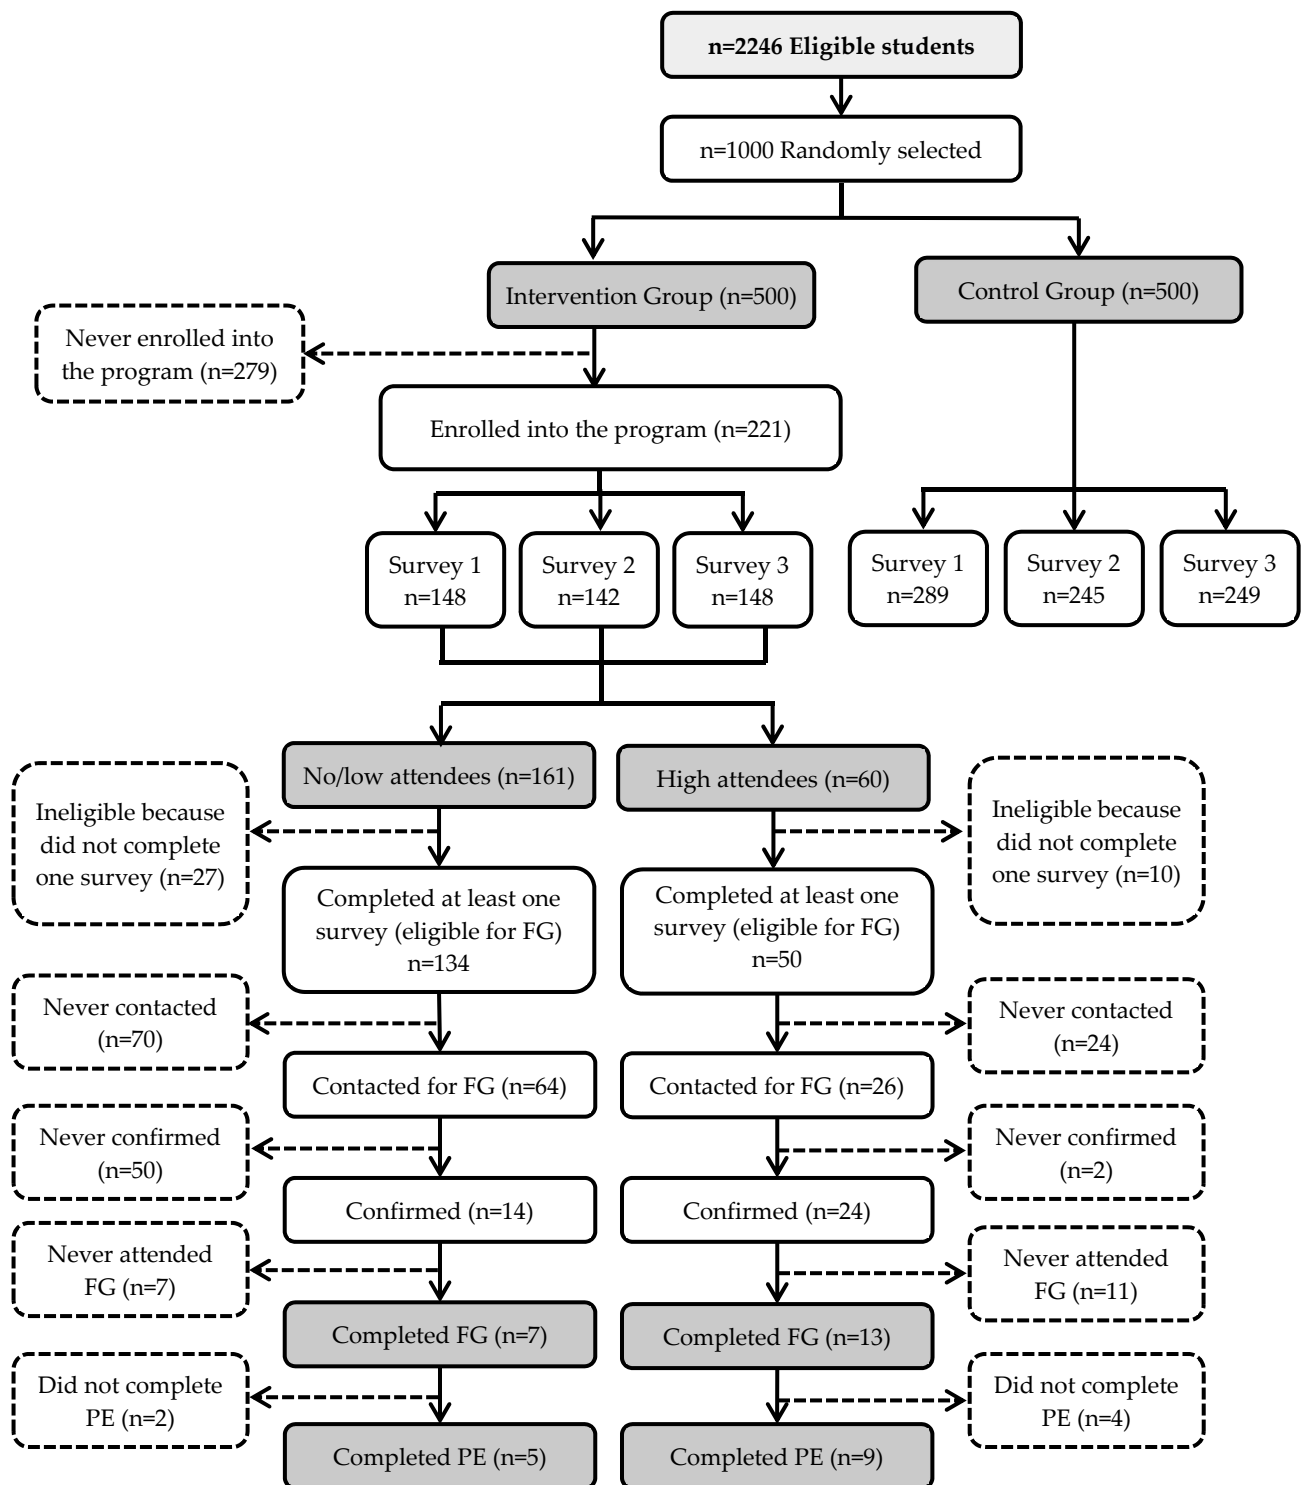

**Supplementary Figure S2.** Consort diagram of cohort 2

No/low attendees= attended 0-2 food distributions; High attendees= attended  $\geq 3$  food distributions; FG= Focus group; PE=Photo elicitation

Note. Those who did not complete at least one survey were ineligible for focus groups

----- Excluded from the sample.

## Supplementary File S1. Dietary intake calculations

**Block Fruit-Vegetable-Fiber Screener.** The Fruit-Vegetable-Fiber screener includes 10-items to capture fruit and vegetable intake, fiber, and micronutrients found in fruits and vegetables. Respondents are asked to consider their eating habits over the past year regarding: fruit juice, fresh/canned fruit, vegetable juice, green salad, potatoes, vegetable soup/stew, other vegetables (e.g., broccoli, string beans), fiber cereals, beans (baked beans, lentils), and dark bread (e.g., whole wheat or rye) based on a 0=Less than once a week; to 5= 2 or more times a day scale. The responses were summed to create a fruit/vegetable score (7 items) and a fruit/vegetable/beans score (10 items). The following equations were used to calculate the fruit/vegetable servings and the estimates of Vitamin C, magnesium, potassium, and dietary fiber [26].

|                                                                                                           |             |
|-----------------------------------------------------------------------------------------------------------|-------------|
| <b><i>Fruit/vegetable servings per day = - 0.23 + [0.37 * (Fruit/Vegetable score)] - [0.55 * Sex]</i></b> | <b>[26]</b> |
| <i>Vitamin C (mg) = 56.5 + [6.6 * (Fruit/Veg/Beans score)] - [26.7 * Sex] - [0.45 * Age]</i>              | [26]        |
| <i>Magnesium (mg) = 272 + [11.6 * (Fruit/Veg/Beans score)] - [92.3 * Sex] - [1.7 * Age]</i>               | [26]        |
| <i>Potassium (mg) = 2348 + [114.8 * (Fruit/Veg/Beans score)] - [759 * Sex] - [13.8 * Age]</i>             | [26]        |
| <i>Dietary Fiber (g) = 12.6 + [0.77 * (Fruit/Veg/Beans score)] - [5.12 * Sex] - [0.16 * Age]</i>          | [26]        |

Note: Negative values that were derived from the calculations above were recoded to zero.

**Block Meat/Snack Screener.** The Meat/Snacks screener includes 17-items to capture dietary fats. Respondents were asked to consider eating habits in the past year regarding: hamburgers/tacos, beef/pork/ribs, fried chicken, hot dogs/sausage, cold cuts/ham, bacon/breakfast sausage, salad dressing, margarine/butter, eggs, pizza, cheese/cheese spread, whole milk, French fries, potatoes chips/popcorn/crackers, doughnuts/cake, cookies, and ice cream. Response options are on a 1 = Once a month or less to 5 = 5 or more times a week scale. The meat/snack score was the sum of responses. The following equations were used to calculate the estimate of total fat, saturated fat and dietary cholesterol [26].

|                                                                                                   |             |
|---------------------------------------------------------------------------------------------------|-------------|
| <b><i>Total fat (g) = 32.7 + [2.4 * (Meat/Snack score)] + [11.2 * Sex]</i></b>                    | <b>[26]</b> |
| <i>Saturated fat (g) = 9.4 + [0.88 * (Meat/Snack score)] - [3.5 * Sex]</i>                        | [26]        |
| <i>Percent fat = 19.8 + [0.6 * (Meat/Snack score)] + [2.3 * Sex]</i>                              | [26]        |
| <i>Dietary cholesterol (g) = 120 + [7.8 * (Meat/Snack score)] - [54.65 * Sex] + [36.6 * Race]</i> | [26]        |

Note: Negative values that were derived from the calculations above were recoded to zero.

**Supplementary Table S1.** Demographic characteristics of the students in two FDP cohorts (n=2000) and bivariate comparison between cohort 1 (n=1000) and cohort 2 (n=1000). Given as mean (SD) or frequency (%).

| Characteristic        | Total sample<br>(n=2000) | Cohort 1<br>(n=1000) | Cohort 2<br>(n=1000) | Comparison test statistics      |         |
|-----------------------|--------------------------|----------------------|----------------------|---------------------------------|---------|
|                       |                          |                      |                      | t value/ Chi <sup>2</sup> value | P value |
| <b>Age</b>            | 29.54 (10.23)            | 29.40 (9.85)         | 29.68 (10.61)        | t= -0.612                       | 0.541   |
| <b>Gender</b>         |                          |                      |                      |                                 |         |
| Male                  | 661 (33.1%)              | 335 (33.5%)          | 326 (32.6%)          | Chi <sup>2</sup> =0.183         | 0.669   |
| Female                | 1,339 (67.0%)            | 665 (66.5%)          | 674 (67.4%)          |                                 |         |
| <b>Race/ethnicity</b> |                          |                      |                      |                                 |         |
| Non-Hispanic white    | 155 (7.8%)               | 80 (8.0%)            | 75 (7.5%)            | Chi <sup>2</sup> =0.175         | 0.676   |
| Non-Hispanic black    | 1,135 (56.8%)            | 581 (58.1%)          | 554 (55.4%)          | Chi <sup>2</sup> =1.485         | 0.223   |
| Hispanic              | 559 (28.0%)              | 263 (26.3%)          | 296 (29.6%)          | Chi <sup>2</sup> =2.704         | 0.100   |
| Other                 | 155 (7.6%)               | 76 (7.6%)            | 75 (7.5%)            | Chi <sup>2</sup> =0.007         | 0.933   |
| <b>Marital status</b> |                          |                      |                      |                                 |         |
| Married               | 142 (7.1%)               | 77 (7.7%)            | 65 (6.5%)            | Chi <sup>2</sup> =1.092         | 0.296   |
| Divorced/separated    | 152 (7.6%)               | 66 (6.6%)            | 86 (8.6%)            | Chi <sup>2</sup> =2.870         | 0.090   |
| Single                | 1,705 (85.3%)            | 857 (85.7%)          | 848 (84.8%)          | Chi <sup>2</sup> =0.265         | 0.607   |
| <b>Academic level</b> |                          |                      |                      |                                 |         |
| Freshman              | 1,449 (72.5%)            | 722 (72.2%)          | 727 (72.7%)          | Chi <sup>2</sup> =0.063         | 0.802   |
| Sophomore             | 117 (5.9%)               | 63 (6.3%)            | 54 (5.4%)            | Chi <sup>2</sup> =0.735         | 0.391   |
| Associate degree      | 152 (7.6%)               | 69 (6.9%)            | 83 (8.3%)            | Chi <sup>2</sup> =1.396         | 0.237   |

|                            |               |             |             |                         |       |
|----------------------------|---------------|-------------|-------------|-------------------------|-------|
| Bachelor's degree          | 50 (2.5%)     | 26 (2.6%)   | 24 (2.4%)   | Chi <sup>2</sup> =0.082 | 0.775 |
| Master's degree            | 10 (0.5%)     | 5 (0.5%)    | 5 (0.5%)    | Chi <sup>2</sup> =0.000 | 1.000 |
| Unclassified/not available | 222 (11.1%)   | 115 (11.5%) | 107 (10.7%) | Chi <sup>2</sup> =0.324 | 0.569 |
| <b>Employment status</b>   |               |             |             |                         |       |
| Full-time employee         | 224 (11.2%)   | 112 (11.2%) | 112 (11.2%) | Chi <sup>2</sup> =0.000 | 1.000 |
| Part-time employee         | 277 (13.9%)   | 135 (13.5%) | 142 (14.2%) | Chi <sup>2</sup> =0.205 | 0.650 |
| Not employed               | 1,499 (75.0%) | 753 (75.3%) | 746 (74.6%) | Chi <sup>2</sup> =0.131 | 0.718 |
| <b>Cumulative GPA</b>      |               |             |             |                         |       |
| At study enrollment        | 2.45 (1.02)   | 2.42 (1.02) | 2.48 (1.03) | t = -1.220              | 0.223 |

Note. Data is based on the student-level administrative data provided by the community college. Percentages may not total 100 due to rounding. The comparison test reported includes independent sample *t*-test for continuous variable and Chi square tests for categorical variables.
